# Supplementary material
Source: HighWire-hosted journal article supplement (https://bmjopen.bmj.com/content/12/3/e050469)

### **Supplementary Figures**

**Supplementary Table 1 – Gastrointestinal outbreaks and GI pathogens\* reported to Public Health England between Week 1 and Week 31 2020 and the 5-year weekly average (95% confidence interval), by COVID-19 outbreak Phase**

| Phase                             |                         | 1                  | 2                | 3                | 4                | 5                | 6                | 7                |
|-----------------------------------|-------------------------|--------------------|------------------|------------------|------------------|------------------|------------------|------------------|
| Week                              |                         | 1-4                | 5-9              | 10-12            | 13-18            | 19-22            | 23-27            | 28-31            |
|                                   |                         | Pre-outbreak phase | Early outbreak   | Pre-lockdown     | Early Lockdown   | Late Lockdown    | Lockdown Easing  | Further Easing   |
| Gastrointestinal outbreaks        | 2020                    | 465                | 510              | 273              | 109              | 46               | 50               | 91               |
|                                   | 2019                    | 545                | 684              | 383              | 752              | 443              | 326              | 314              |
|                                   | 5 year average (95% CI) | 489 (444 - 534)    | 651 (605 - 697)  | 454 (357 - 551)  | 667 (554 - 780)  | 350 (294 - 406)  | 292 (226 - 358)  | 305 (273 - 337)  |
|                                   | % Change                | -5%                | -22%             | -40%             | -84%             | -87%             | -83%             | -70%             |
| Viral outbreaks                   | 2020                    | 390                | 441              | 224              | 80               | 27               | 36               | 54               |
|                                   | 5-year average (95% CI) | 417 (377-457)      | 558 (512-604)    | 391 (305-477)    | 555 (449-660)    | 281 (239-324)    | 225 (174-276)    | 229 (203-256)    |
| Bacterial outbreaks               | 2020                    | 9                  | 9                | 4                | 8                | 9                | 7                | 14               |
|                                   | 5-year average (95% CI) | 11 (7-14)          | 12 (8-15)        | 7 (4-10)         | 18 (16-19)       | 18 (14-22)       | 18 (15-22)       | 24 (20-27)       |
| Parasitic outbreaks               | 2020                    | 2                  | 1                | 0                | 1                | 0                | 0                | 0                |
|                                   | 5-year average (95% CI) | 4 (2-5)            | 3 (1-6)          | 4 (2-5)          | 12 (9-14)        | 7 (5-10)         | 3 (2-5)          | 3 (2-4)          |
| Care home Setting                 | 2020                    | 301                | 318              | 169              | 98               | 30               | 37               | 55               |
|                                   | 5-year average (95% CI) | 324 (283-364)      | 402 (355-448)    | 273 (216-329)    | 429 (360-497)    | 205 (167-243)    | 156 (121-190)    | 167 (153-182)    |
| Healthcare Setting                | 2020                    | 54                 | 45               | 34               | 3                | 1                | 4                | 7                |
|                                   | 5-year average (95% CI) | 62 (51-73)         | 89 (75-103)      | 55 (29-80)       | 85 (54-116)      | 32 (24-40)       | 28 (18-38)       | 25 (21-29)       |
| Educational Setting               | 2020                    | 58                 | 102              | 53               | 0                | 2                | 3                | 10               |
|                                   | 5-year average (95% CI) | 66 (45-87)         | 107 (85-130)     | 86 (70-102)      | 77 (57-98)       | 62 (51-73)       | 61 (37-84)       | 51 (39-64)       |
| Food outlet Setting               | 2020                    | 29                 | 14               | 3                | 1                | 1                | 1                | 6                |
|                                   | 5-year average (95% CI) | 10 (8-12)          | 18 (11-25)       | 13 (9-17)        | 23 (16-30)       | 14 (10-17)       | 8 (6-11)         | 13 (9-17)        |
| Custodial Setting                 | 2020                    | 6                  | 28               | 1                | 0                | 0                | 1                | 1                |
|                                   | 5-year average (95% CI) | 2 (1-3)            | 2 (0-3)          | 2 (1-3)          | 3 (1-4)          | 2 (0-3)          | 1 (1-2)          | 3 (2-5)          |
| Other Settings                    | 2020                    | 17                 | 28               | 13               | 7                | 12               | 4                | 12               |
|                                   | 5-year average (95% CI) | 25 (19-32)         | 34 (27-41)       | 25 (20-31)       | 51 (44-57)       | 36 (31-41)       | 38 (34-42)       | 45 (40-50)       |
| Laboratory confirmed GI organisms | 2020                    | 6023               | 7374             | 3520             | 2859             | 3284             | 4617             | 6205             |
|                                   | 2019                    | 5041               | 6499             | 4180             | 8561             | 6967             | 8117             | 9877             |
|                                   | 5 year average (95% CI) | 5016 (4721-5311)   | 6471 (5969-6973) | 3943 (3591-4295) | 8345 (7602-9088) | 6553 (5829-7277) | 7879 (7539-8219) | 9303 (8746-9860) |
|                                   | % Change                | 20%                | 14%              | -11%             | -66%             | -50%             | -41%             | -33%             |

\* Organisms: Campylobacter, STEC O157, STEC Non-O157, Listeria, non-typhoidal Salmonella, typhoidal Salmonella, Shigella, Norovirus, Cryptosporidium and Giardia

**Supplementary Figure 1 – Laboratory confirmed GI pathogens reported to Public Health England between Week 1 and Week 31 2020 and the 5-year weekly average, by age group and sex**

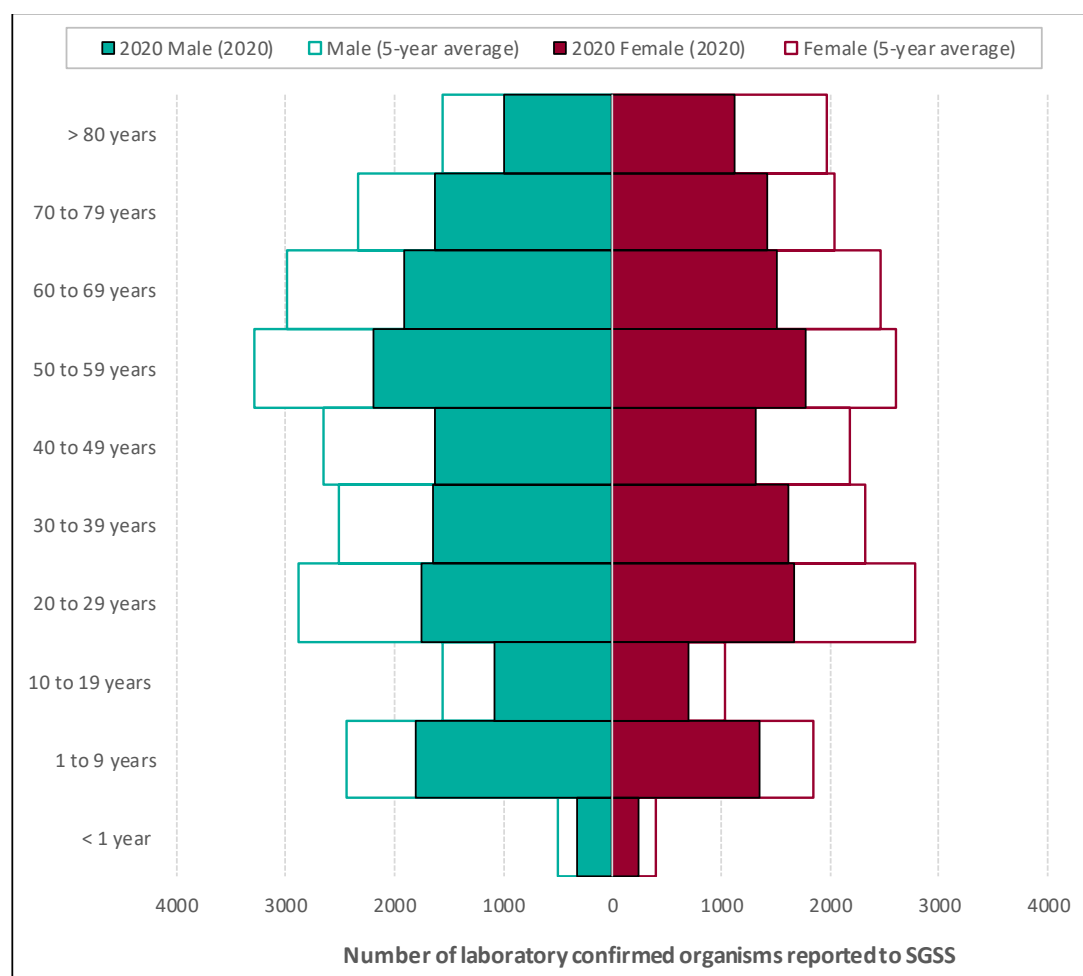

**Supplementary Figure 2 – Laboratory confirmed GI pathogens reported between Week 1 and Week 31 2020 and 5-year weekly average, by COVID-19 outbreak Phase and PHE region**

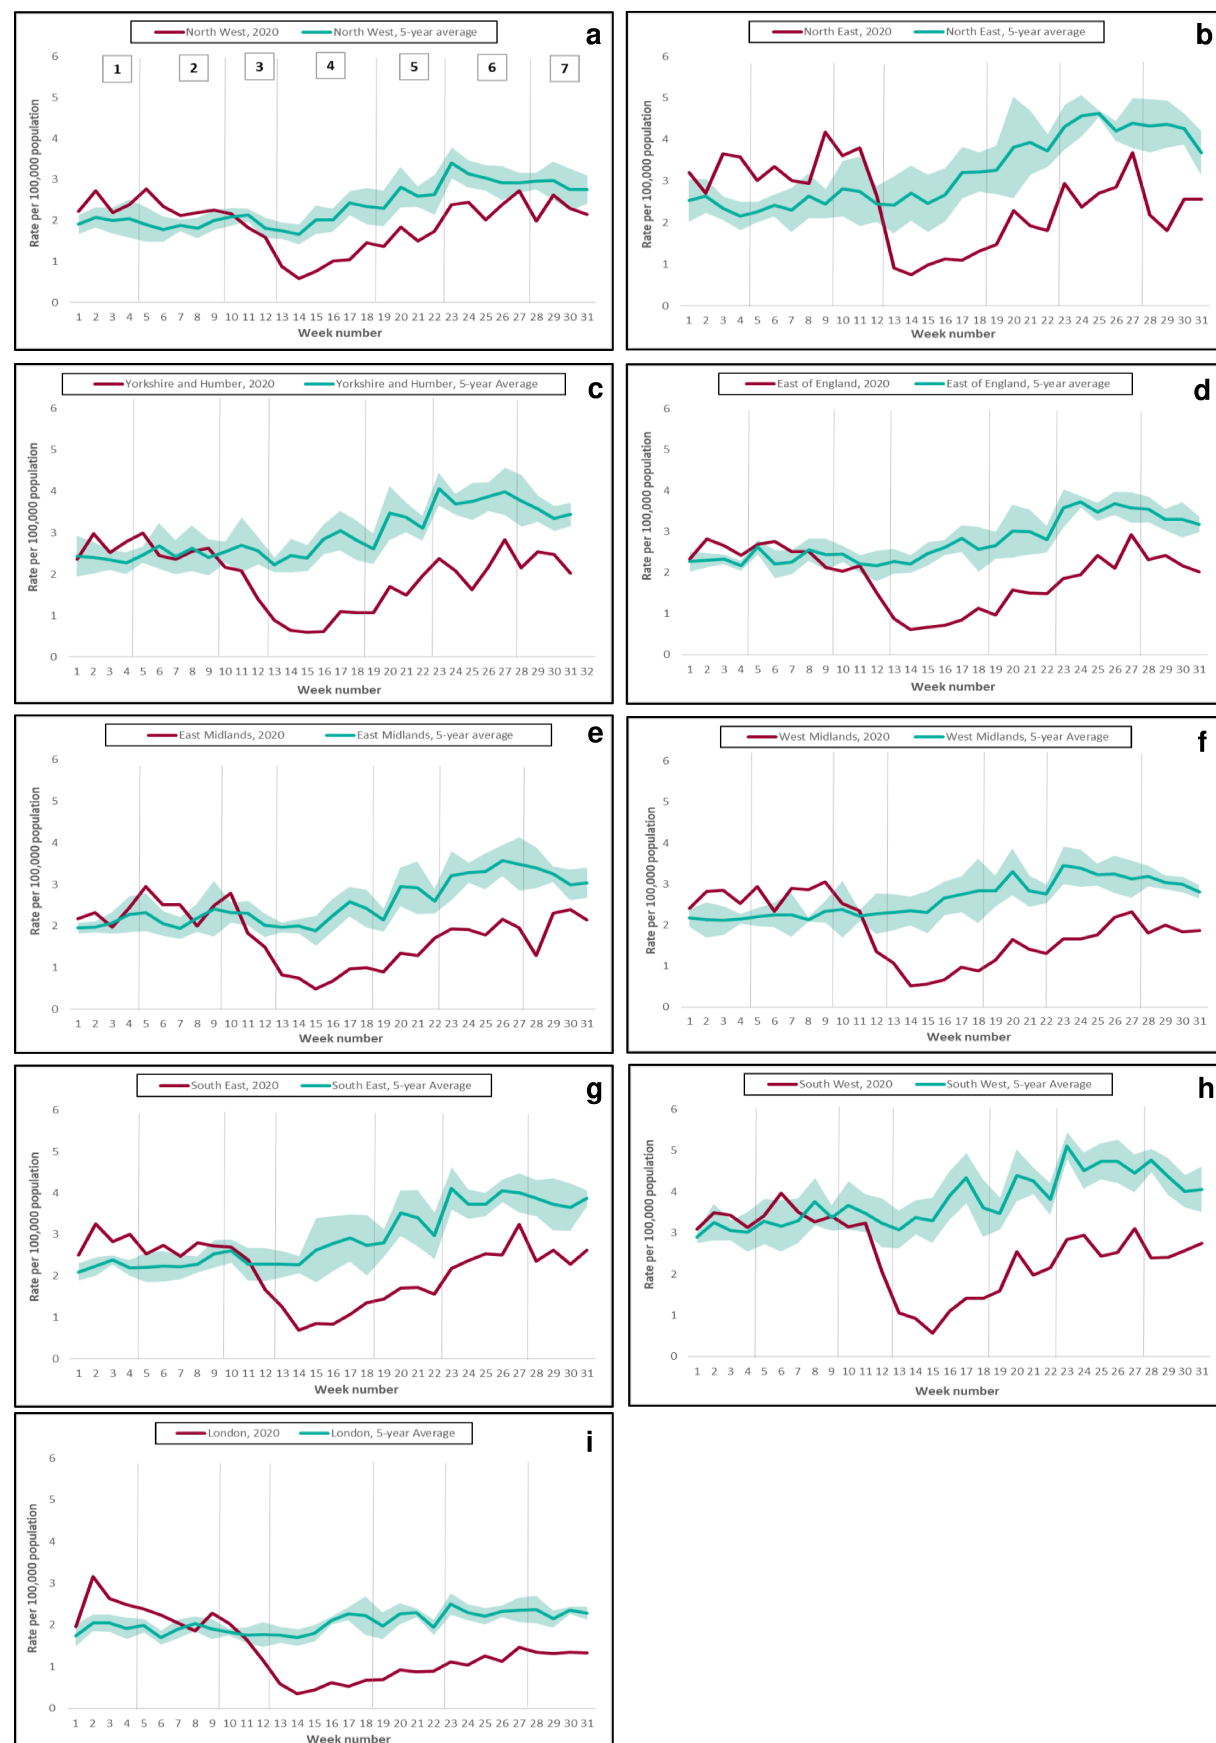

**Supplementary Figure 3 – Correlation between cumulative laboratory confirmed GI diagnoses (percentage relative effect between 2020 and the 5-year average) and cumulative COVID-19 rate for English Upper Tier Local Authorities\*, Phase 2 to Phase 7 of the COVID response**

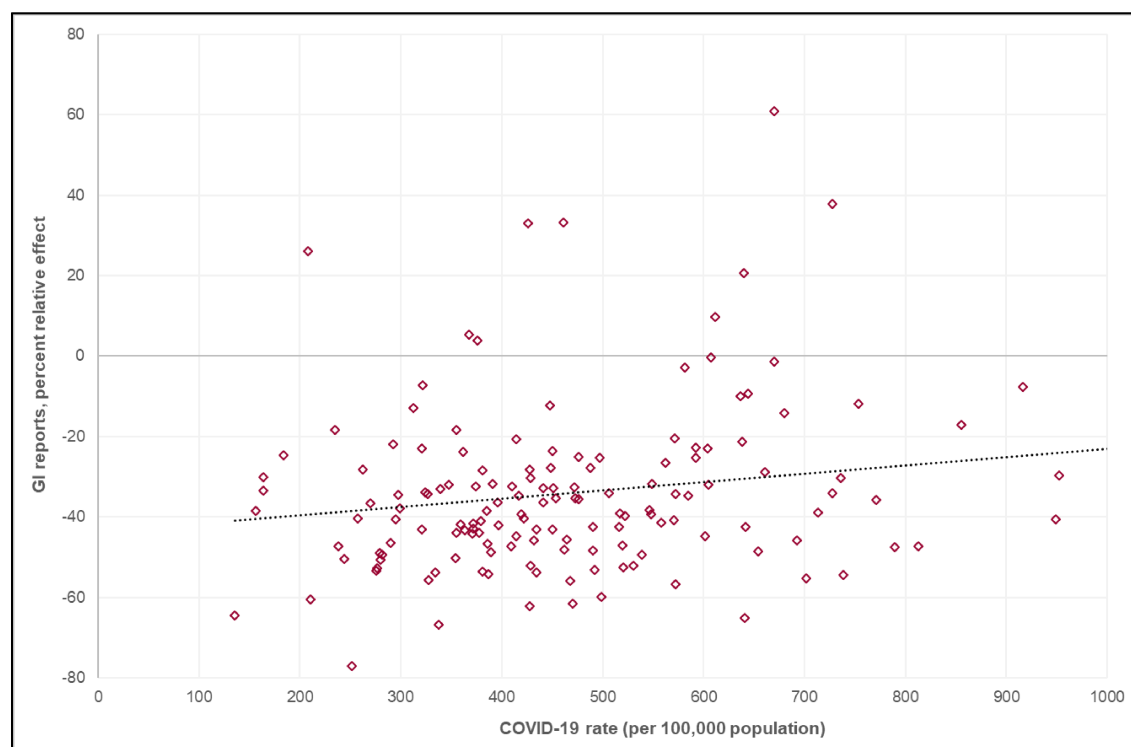

\*Graph excludes the Leicester Upper Tier Local Authority due to higher cumulative COVID-19 rate than other local authority areas up to 02 August 2020. Leicester was included in the Pearson's correlation analysis.

**Supplementary Figure 4 – Daily number of total attendances with a diagnostic code recorded across the Emergency Department Syndromic Surveillance network indicating the seven-day moving average, Phase 1 – 7 of the COVID-19 outbreak response, 2019 and 2020.**

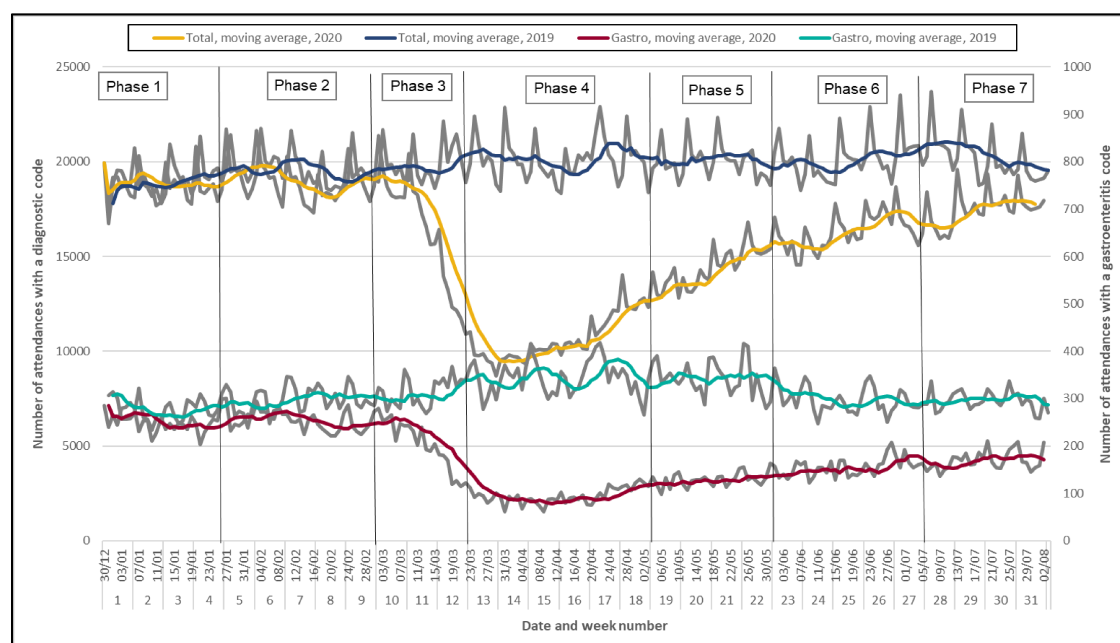

**Supplementary Figure 5 – Daily GP-in hours incidence rate and 7-day moving average (adjusted for weekends and bank holidays) per 100,000 population for (a) vomiting and (b) diarrhoea and daily calls as a percentage of total calls and moving 7-day average for (c) ‘Diarrhoea’ calls and (d) ‘Vomiting’ calls**

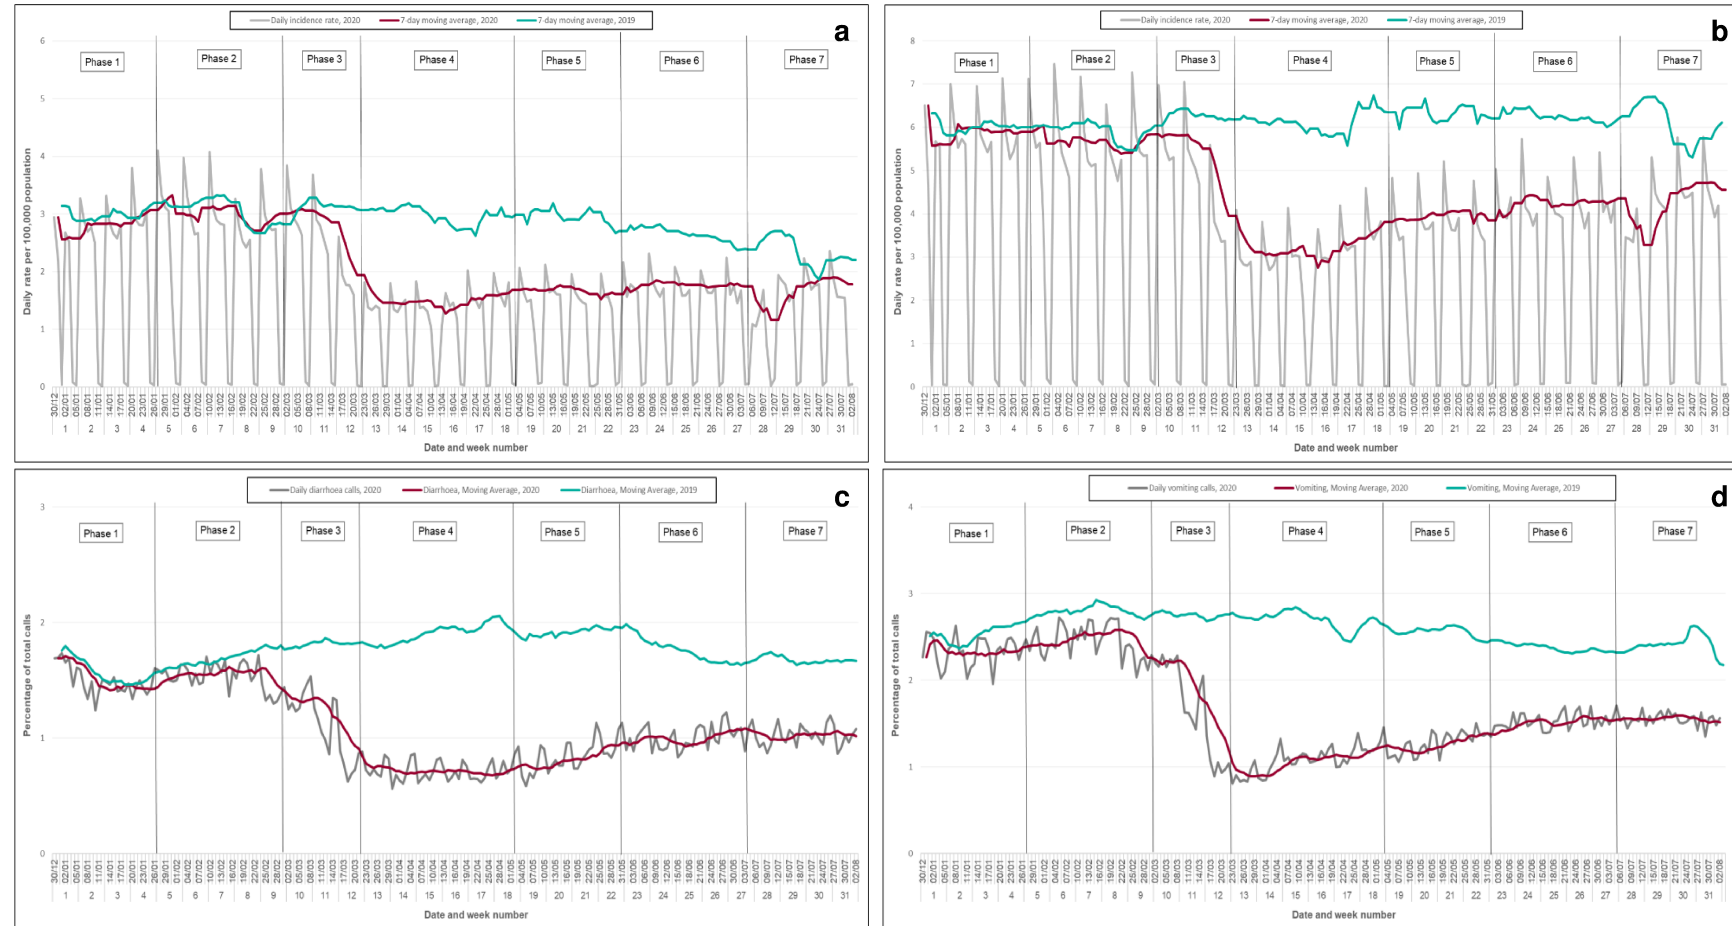

**Supplementary Figure 6 -GP in hours average daily rate by week per 100,000 population for gastroenteritis consultations, COVID-19 outbreak Phase and age group, (a) 2019 and (b) 2020**

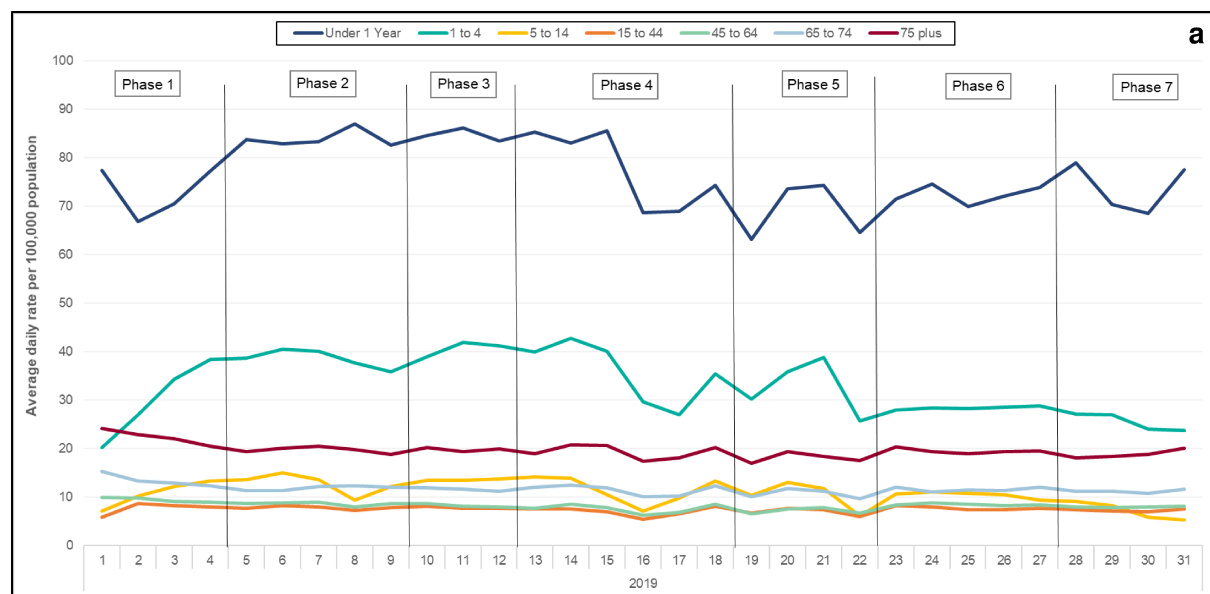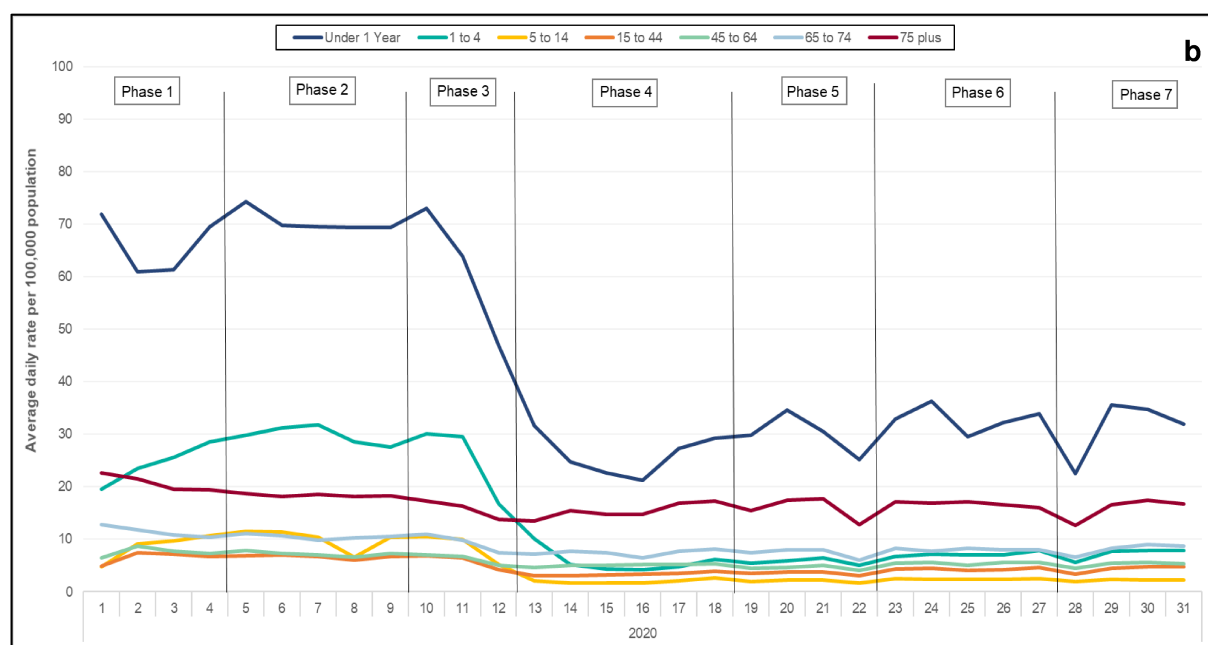



**Supplementary Figure 7 - GP in hours average daily rate by week per 100,000 population for gastroenteritis consultations, COVID-19 outbreak Phase and PHE region, 2019 and 2020**

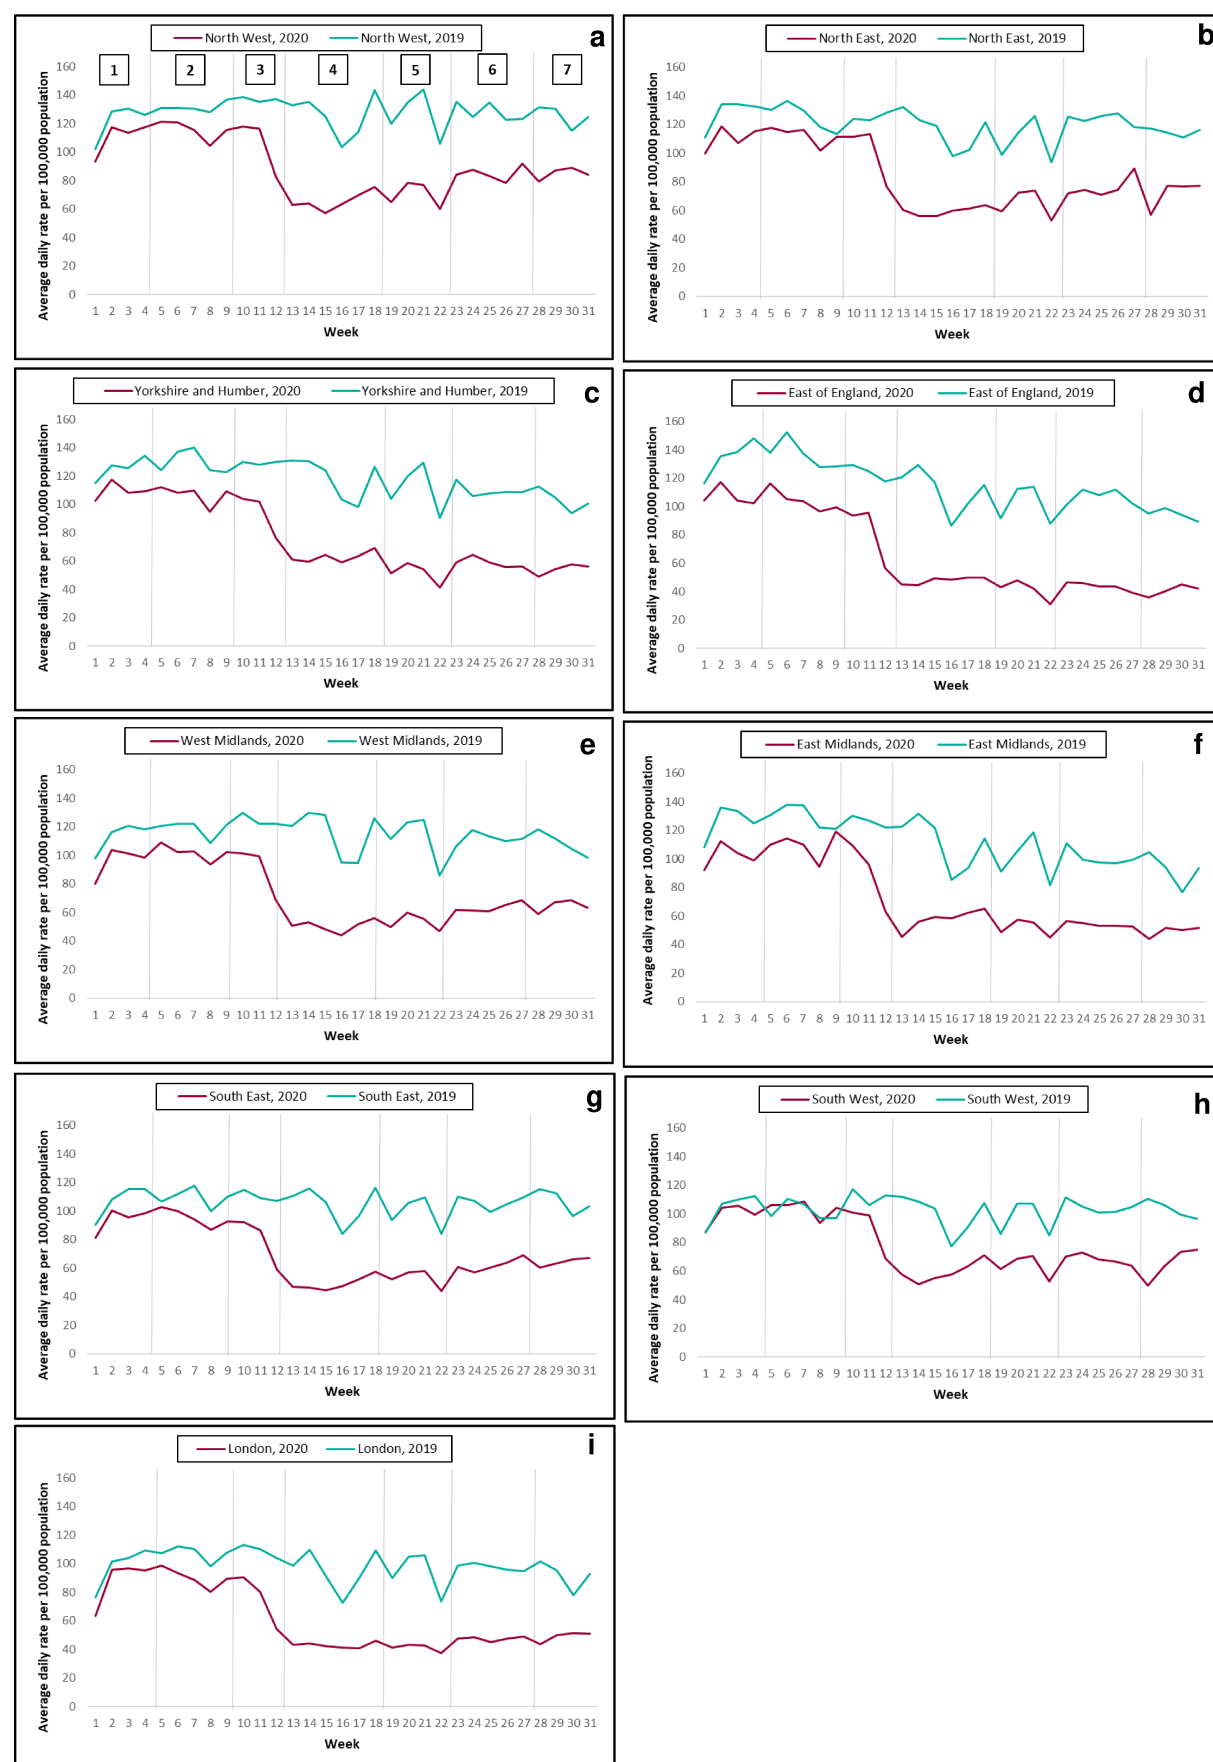

**Supplementary Table 2 – Exposures reported in routine environmental health surveillance questionnaires\* for GI pathogens, North East residents. Phase 2 – Phase 7 of the COVID-19 outbreak**

| Exposure category |                    | Current cases (2020) |           | Historic cases (2015-2019) |           |            |              |         |
|-------------------|--------------------|----------------------|-----------|----------------------------|-----------|------------|--------------|---------|
|                   |                    | Exposed              | Unexposed | Exposed                    | Unexposed | Odds ratio | 95% CI       | P value |
| All GI organisms  | Foreign Travel     | 25                   | 133       | 590                        | 1151      | 0.37       | [0.23-0.57]  | <0.001  |
|                   | Visitor Attraction | 3                    | 130       | 106                        | 1045      | 0.23       | [0.05-0.70]  | 0.006   |
|                   | Water Exposure     | 22                   | 111       | 293                        | 858       | 0.58       | [0.34-0.94]  | 0.024   |
|                   | Food Outlet        | 94                   | 39        | 898                        | 253       | 0.68       | [0.45-1.04]  | 0.056   |
|                   | Contact            | 24                   | 109       | 269                        | 882       | 0.72       | [0.43-1.16]  | 0.166   |
|                   | Rural Environment  | 12                   | 121       | 84                         | 1067      | 1.26       | [0.61-2.40]  | 0.474   |
|                   | Travel (UK)        | 17                   | 116       | 173                        | 978       | 0.83       | [0.46-1.43]  | 0.489   |
|                   | Animal Contact     | 82                   | 51        | 744                        | 407       | 0.88       | [0.60-1.30]  | 0.496   |
|                   | Social and Leisure | 15                   | 118       | 119                        | 1032      | 1.10       | [0.58-1.97]  | 0.737   |
|                   | Sports and Leisure | 2                    | 131       | 14                         | 1137      | 1.24       | [0.14-5.49]  | 0.777   |
| Cryptosporidium   | Foreign Travel     | 23                   | 0         | 384                        | 71        | 0.00       | [0.00-0.74]  | 0.023   |
|                   | Food Outlet        | 23                   | 13        | 313                        | 239       | 0.40       | [0.16-1.07]  | 0.034   |
|                   | Contact            | 23                   | 10        | 313                        | 79        | 2.28       | [0.86-5.86]  | 0.056   |
|                   | Visitor Attraction | 23                   | 2         | 313                        | 63        | 0.38       | [0.04-1.62]  | 0.18    |
|                   | Animal Contact     | 23                   | 16        | 313                        | 253       | 0.54       | [0.20-1.63]  | 0.192   |
|                   | Travel (UK)        | 23                   | 6         | 313                        | 52        | 1.77       | [0.54-4.99]  | 0.246   |
|                   | Sports and Leisure | 23                   | 0         | 313                        | 6         | 0          | [0.00-8.90]  | 0.503   |
|                   | Water Exposure     | 23                   | 9         | 313                        | 141       | 0.78       | [0.29-2.01]  | 0.582   |
|                   | Rural Environment  | 23                   | 4         | 313                        | 45        | 1.25       | [0.30-4.02]  | 0.693   |
|                   | Social and Leisure | 23                   | 2         | 313                        | 25        | 1.1        | [0.12-4.94]  | 0.904   |
| STEC              | Visitor Attraction | 21                   | 0         | 70                         | 10        | 0.00       | [0.00-1.15]  | 0.066   |
|                   | Social and Leisure | 21                   | 2         | 70                         | 19        | 0.28       | [0.03-1.38]  | 0.093   |
|                   | Foreign Travel     | 23                   | 2         | 92                         | 22        | 0.30       | [0.03-1.42]  | 0.108   |
|                   | Contact            | 21                   | 3         | 70                         | 19        | 0.45       | [0.08-1.81]  | 0.227   |
|                   | Animal Contact     | 21                   | 3         | 70                         | 19        | 0.45       | [0.08-1.81]  | 0.227   |
|                   | Travel (UK)        | 21                   | 3         | 70                         | 16        | 0.56       | [0.09-2.32]  | 0.397   |
|                   | Water Exposure     | 21                   | 6         | 70                         | 25        | 0.72       | [0.20-2.29]  | 0.545   |
|                   | Rural Environment  | 21                   | 3         | 70                         | 8         | 1.29       | [0.20-6.12]  | 0.725   |
|                   | Food Outlet        | 21                   | 18        | 70                         | 58        | 1.24       | [0.29-7.59]  | 0.757   |
| Giardia           | Water Exposure     | 29                   | 6         | 318                        | 113       | 35.53      | [0.15-1.24]  | 0.107   |
|                   | Foreign Travel     | 35                   | 6         | 438                        | 120       | 0.55       | [0.18-1.39]  | 0.187   |
|                   | Animal Contact     | 29                   | 16        | 318                        | 206       | 64.78      | [0.29-1.57]  | 0.302   |
|                   | Contact            | 29                   | 3         | 318                        | 53        | 16.67      | [0.11-1.99]  | 0.376   |
|                   | Travel (UK)        | 29                   | 4         | 318                        | 64        | 20.13      | [0.16-1.94]  | 0.411   |
|                   | Visitor Attraction | 29                   | 1         | 318                        | 22        | 6.92       | [0.01-3.22]  | 0.472   |
|                   | Sports and Leisure | 29                   | 0         | 318                        | 4         | 1.26       | [0.00-10.77] | 0.544   |
|                   | Food Outlet        | 29                   | 20        | 318                        | 232       | 72.96      | [0.34-2.14]  | 0.645   |
|                   | Rural Environment  | 29                   | 3         | 318                        | 28        | 8.81       | [0.22-4.29]  | 0.781   |
|                   | Social and Leisure | 29                   | 1         | 318                        | 11        | 3.46       | [0.02-7.34]  | 0.998   |
| Salmonella        | Foreign Travel     | 65                   | 14        | 739                        | 335       | 45.33      | [0.17-0.62]  | <0.001  |
|                   | Food Outlet        | 51                   | 35        | 404                        | 329       | 0.50       | [0.25-1.02]  | 0.031   |
|                   | Rural Environment  | 51                   | 2         | 404                        | 3         | 5.46       | [0.44-48.53] | 0.040   |
|                   | Contact            | 51                   | 7         | 404                        | 99        | 0.49       | [0.18-1.15]  | 0.086   |
|                   | Visitor Attraction | 51                   | 0         | 404                        | 7         | 0.00       | [0.00-4.35]  | 0.343   |
|                   | Animal Contact     | 51                   | 33        | 404                        | 234       | 1.33       | [0.70-2.60]  | 0.354   |
|                   | Water Exposure     | 51                   | 0         | 404                        | 5         | 0.00       | [0.00-6.13]  | 0.424   |
|                   | Travel (UK)        | 51                   | 3         | 404                        | 35        | 0.66       | [0.13-2.22]  | 0.499   |
|                   | Social and Leisure | 51                   | 9         | 404                        | 61        | 1.2        | [0.49-2.68]  | 0.635   |
| Shigella          | Contact            | 9                    | 1         | 46                         | 19        | 0.18       | [0.00-1.55]  | 0.085   |
|                   | Sports and Leisure | 9                    | 2         | 46                         | 3         | 4.10       | [0.28-41.60] | 0.134   |
|                   | Foreign Travel     | 12                   | 3         | 88                         | 42        | 47.73      | [0.06-1.61]  | 0.138   |
|                   | Visitor Attraction | 9                    | 0         | 46                         | 4         | 0.00       | [0.00-5.04]  | 0.358   |
|                   | Water Exposure     | 9                    | 1         | 46                         | 9         | 0.51       | [0.01-4.83]  | 0.548   |
|                   | Social and Leisure | 9                    | 1         | 46                         | 3         | 1.79       | [0.03-25.55] | 0.628   |
|                   | Food Outlet        | 9                    | 8         | 46                         | 40        | 1.20       | [0.12-62.00] | 0.874   |
|                   | Travel (UK)        | 9                    | 1         | 46                         | 6         | 0.83       | [0.02-8.57]  | 0.874   |
|                   | Animal Contact     | 9                    | 1         | 46                         | 5         | 1.02       | [0.02-11.19] | 0.983   |

\*Questionnaires for *Cryptosporidium* sp, *Giardia lamblia*, giardia, STEC. *Salmonella* sp and *Shigella* sp

‡Cases reporting foreign travel exposure were excluded from the analysis of all other exposure categories

**Supplementary Figure 8 – Google trend searches between 01/01/2017 and 02/08/2020 for (a) protective factors associated with GI illness and (b) key search phrases associated with GI illness, indicating the seven Phases of the COVID-19 response**

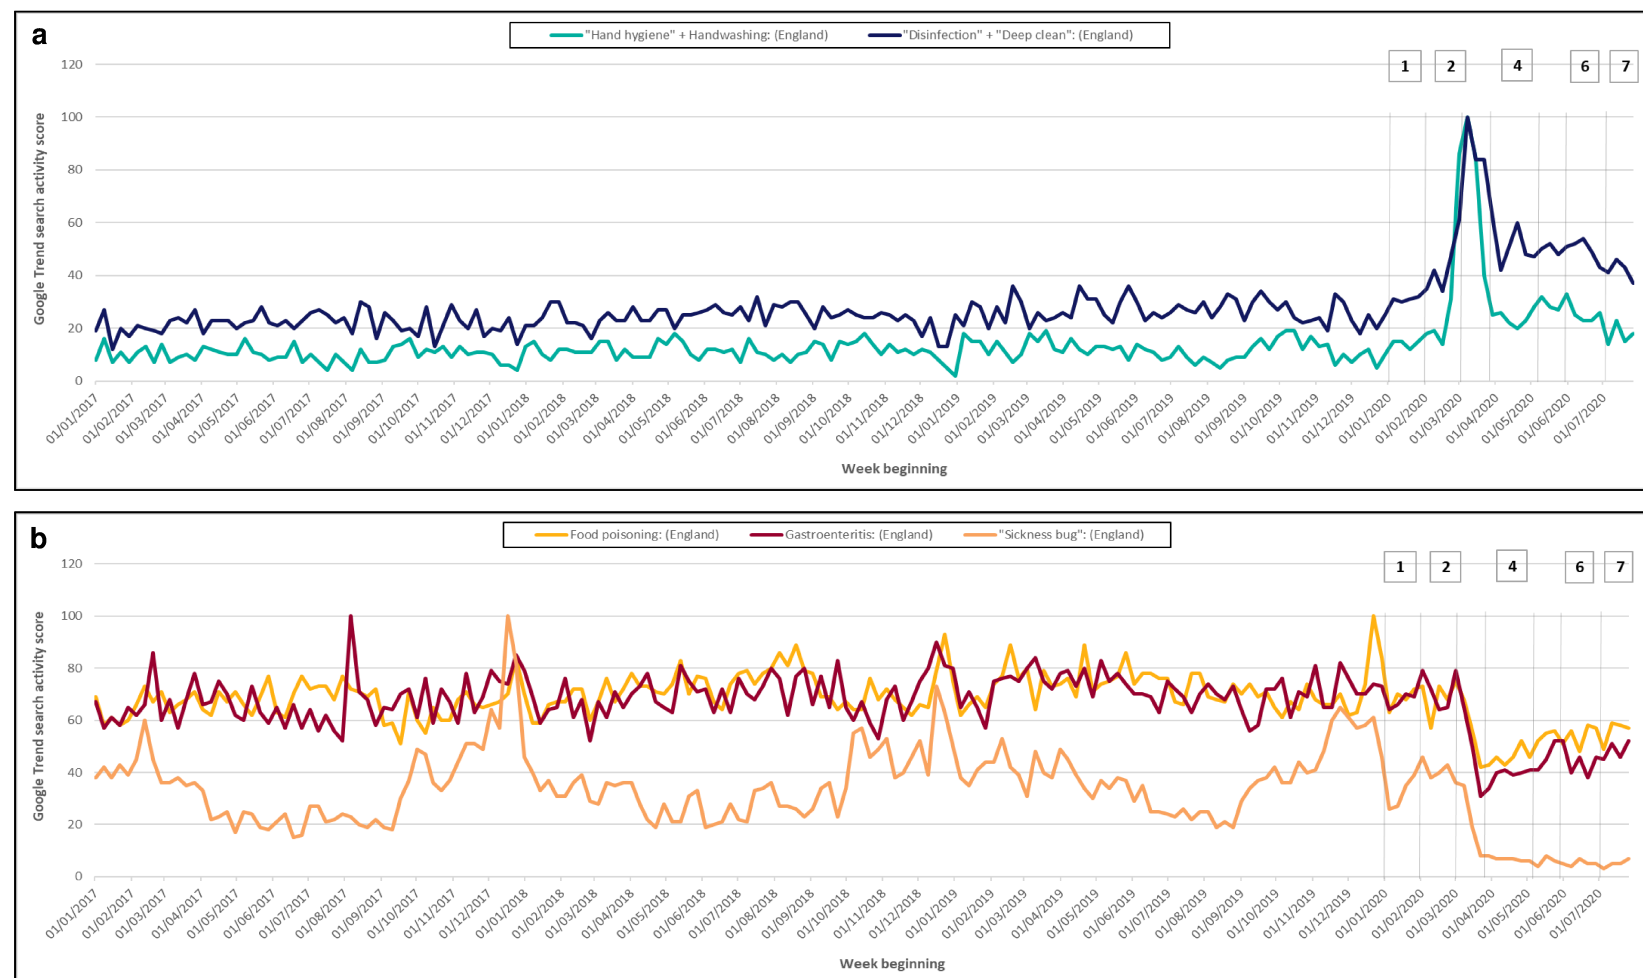

Supplement: inline-supplementary-material-1 [file inline-supplementary-material-1.pdf]
